# Supplementary material
Source: publisher figshare collection journal article supplement (https://aacr.figshare.com/articles/dataset/_/23676033)
Supplement: Supplementary file 1 [file 41550153]

Patient number  
(Best response)

Months

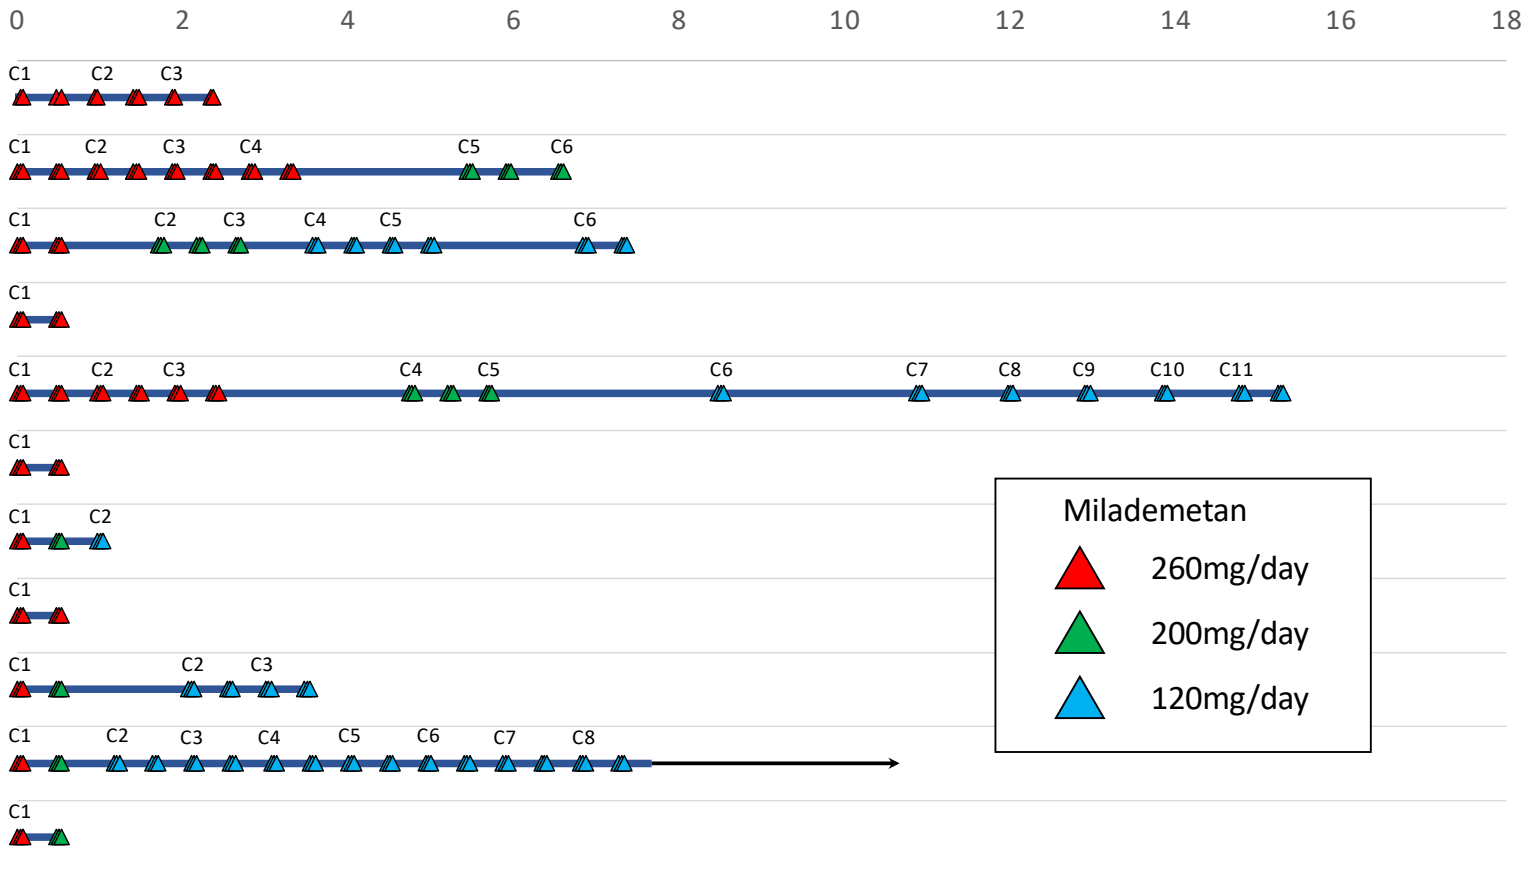

As of May 11, 2022

## **Supplementary Fig. S3. Dosing schedule in 11 patients.**

Abbreviations: c, cycle; SD, stable disease; PD, progression disease; PR, partial response; NE, not evaluated
